# Supplementary material
Source: Springer Nature journal article supplement (https://www.springermedizin.de/resource/supplementary/12885_2014_4736_MOESM4_ESM.pdf/9467148)

**A**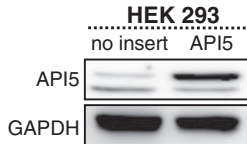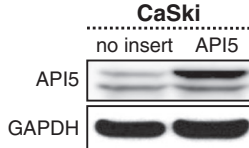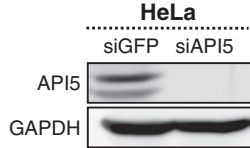**B**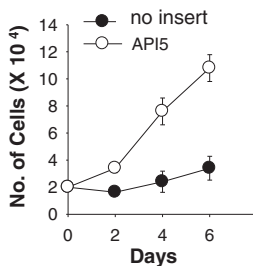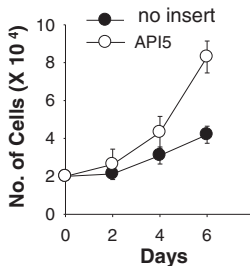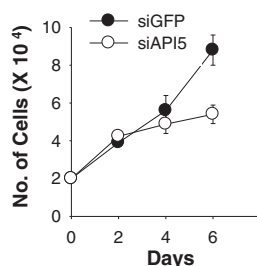**C**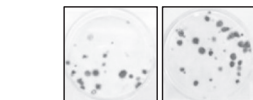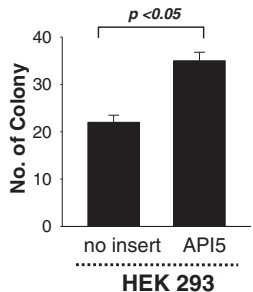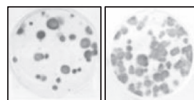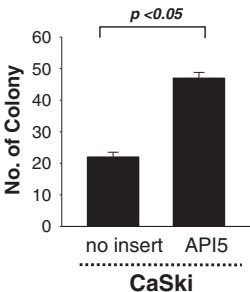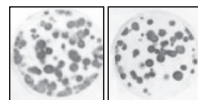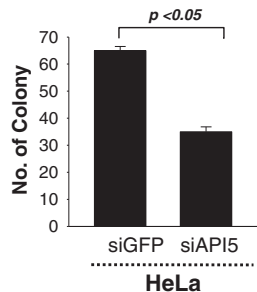

Supplement: MOESM4 [file 9467148]
